# Supplementary material for: Emotional Reaction to the First Dose of COVID-19 Vaccine: Post Vaccination Decline in Anxiety and Stress Among Anxious Individuals and Increase Among Individuals with Normal Anxiety Levels Pre Vaccination
Source: Preprints.org preprint supplement (doi:10.20944/preprints202205.0082.v1), 2022-05-06
Supplement: Supplementary file 1 [file supplementary]

## Sheet: The whole sample
Mann-Whitney Test
Ranks
Gender		N	Mean Rank	Sum of Ranks
StressTotalPre	Male	70	123.929	8675
	Female	180	126.111	22700
	Total	250
StressTotalPost	Male	70	117.279	8209.5
	Female	180	128.697	23165.5
	Total	250
AnxietyTotalPre	Male	70	134.043	9383
	Female	180	122.178	21992
	Total	250
AnxietyTotalPost	Male	70	116.214	8135
	Female	180	129.111	23240
	Total	250
DepressionTotalPre	Male	70	124.343	8704
	Female	180	125.95	22671
	Total	250
DepressionTotalPost	Male	70	130.307	9121.5
	Female	180	123.631	22253.5
	Total	250
Test Statisticsa
	StressTotalPre	StressTotalPost	AnxietyTotalPre	AnxietyTotalPost
Mann-Whitney U	6190	5724.5	5702	5650
Wilcoxon W	8675	8209.5	21992	8135
Z	-0.215784	-1.13278	-1.17573	-1.27981
Asymp. Sig. (2-tailed)	0.829156	0.257308	0.239703	0.200611
a. Grouping Variable: Gender
Mann-Whitney Test
Ranks
AgeCAt		N	Mean Rank	Sum of Ranks
StressTotalPre	1.00	187	126.193	23598
	2.00	63	123.444	7777
	Total	250
StressTotalPost	1.00	187	127.818	23902
	2.00	63	118.619	7473
	Total	250
AnxietyTotalPre	1.00	187	125.043	23383
	2.00	63	126.857	7992
	Total	250
AnxietyTotalPost	1.00	187	126.703	23693.5
	2.00	63	121.929	7681.5
	Total	250
Test Statisticsa
	StressTotalPre	StressTotalPost	AnxietyTotalPre	AnxietyTotalPost
Mann-Whitney U	5761	5457	5805	5665.5
Wilcoxon W	7777	7473	23383	7681.5
Z	-0.262718	-0.882433	-0.173847	-0.458153
Asymp. Sig. (2-tailed)	0.792768	0.377542	0.861986	0.646843
a. Grouping Variable: AgeCAt
Kruskal-Wallis Test
Ranks
Single,Married,Divorce,Widow		N	Mean Rank
StressTotalPre	Single	46	128.554
	Married	166	122.741
	Divorce	15	116.533
	Widow	23	145.152
	Total	250
StressTotalPost	Single	46	127.065
	Married	166	123.452
	Divorce	15	141.367
	Widow	23	126.804
	Total	250
AnxietyTotalPre	Single	46	134.88
	Married	166	120.066
	Divorce	15	132.8
	Widow	23	141.196
	Total	250
AnxietyTotalPost	Single	46	120.761
	Married	166	125.241
	Divorce	15	146.033
	Widow	23	123.457
	Total	250
Test Statisticsa,b
	StressTotalPre	StressTotalPost	AnxietyTotalPre	AnxietyTotalPost
Chi-Square	2.285	0.903006	3.00309	1.45849
df	3	3	3	3
Asymp. Sig.	0.5154	0.824702	0.391148	0.691884
a. Kruskal Wallis Test
b. Grouping Variable: Single,Married,Divorce,Widow
Nonparametric Correlations
Correlations
			StressTotalPre	StressTotalPost	Gender	Subjects age	Single,Married,Divorce,Widow	Secondary school,Diploma,BSc,MSc	Infected with disease or not
Spearman's rho	StressTotalPre	Correlation Coefficient	1	.270**	0.0136748	-.154*	0.0207335	-0.0117717	0.0983663
		Sig. (2-tailed)		1.544e-05	0.829656	0.0146885	0.74426	0.853072	0.120835
		N	250	250	250	250	250	250	250
	StressTotalPost	Correlation Coefficient	.270**	1	0.0717868	-0.0371785	0.0159465	0.0504006	0.00443834
		Sig. (2-tailed)	1.544e-05		0.258131	0.558481	0.8019	0.427537	0.944333
		N	250	250	250	250	250	250	250
	AnxietyTotalPre	Correlation Coefficient	.765**	.284**	-0.0745088	-0.0973443	0.00342829	-0.0537409	-0.0281832
		Sig. (2-tailed)	2.44839e-49	5.17687e-06	0.240469	0.124764	0.956987	0.397513	0.657425
		N	250	250	250	250	250	250	250
	AnxietyTotalPost	Correlation Coefficient	.308**	.782**	0.0811049	-0.0346467	0.0425281	0.088646	-0.0192388
		Sig. (2-tailed)	6.79995e-07	7.35897e-53	0.201228	0.585594	0.503265	0.16231	0.762122
		N	250	250	250	250	250	250	250
	Gender	Correlation Coefficient	0.0136748	0.0717868	1	-.190**	-0.0703766	0.114892	0.0900963
		Sig. (2-tailed)	0.829656	0.258131		0.00258546	0.267624	0.0697525	0.155521
		N	250	250	250	250	250	250	250
	Subjects age	Correlation Coefficient	-.154*	-0.0371785	-.190**	1	.273**	-0.0762571	0.0101047
		Sig. (2-tailed)	0.0146885	0.558481	0.00258546		1.15654e-05	0.229582	0.87369
		N	250	250	250	250	250	250	250
	Single,Married,Divorce,Widow	Correlation Coefficient	0.0207335	0.0159465	-0.0703766	.273**	1	-0.0859462	0.0378726
		Sig. (2-tailed)	0.74426	0.8019	0.267624	1.15654e-05		0.175537	0.551154
		N	250	250	250	250	250	250	250
	Secondary school,Diploma,BSc,MSc	Correlation Coefficient	-0.0117717	0.0504006	0.114892	-0.0762571	-0.0859462	1	-0.0157334
		Sig. (2-tailed)	0.853072	0.427537	0.0697525	0.229582	0.175537		0.804494
		N	250	250	250	250	250	250	250
	Infected with disease or not	Correlation Coefficient	0.0983663	0.00443834	0.0900963	0.0101047	0.0378726	-0.0157334	1
		Sig. (2-tailed)	0.120835	0.944333	0.155521	0.87369	0.551154	0.804494
		N	250	250	250	250	250	250	250
**. Correlation is significant at the 0.01 level (2-tailed).
*. Correlation is significant at the 0.05 level (2-tailed).
Mann-Whitney Test
Ranks
Infected with disease or not		N	Mean Rank	Sum of Ranks
StressTotalPre	YES	19	100.921	1917.5
	NO	231	127.522	29457.5
	Total	250
StressTotalPost	YES	19	124.395	2363.5
	NO	231	125.591	29011.5
	Total	250
AnxietyTotalPre	YES	19	132.526	2518
	NO	231	124.922	28857
	Total	250
AnxietyTotalPost	YES	19	130.289	2475.5
	NO	231	125.106	28899.5
	Total	250
Test Statisticsa
	StressTotalPre	StressTotalPost	AnxietyTotalPre	AnxietyTotalPost
Mann-Whitney U	1727.5	2173.5	2061	2103.5
Wilcoxon W	1917.5	2363.5	28857	28899.5
Z	-1.55219	-0.0700359	-0.444723	-0.303583
Asymp. Sig. (2-tailed)	0.120616	0.944165	0.65652	0.761446
a. Grouping Variable: Infected with disease or not
Mann-Whitney Test
Ranks
Secondary school,Diploma,BSc,MSc		N	Mean Rank	Sum of Ranks
StressTotalPre	Secondary	72	126.826	9131.5
	Higher than secondary	178	124.963	22243.5
	Total	250
StressTotalPost	Secondary	72	119.84	8628.5
	Higher than secondary	178	127.789	22746.5
	Total	250
AnxietyTotalPre	Secondary	72	131.542	9471
	Higher than secondary	178	123.056	21904
	Total	250
AnxietyTotalPost	Secondary	72	115.549	8319.5
	Higher than secondary	178	129.525	23055.5
	Total	250
Test Statisticsa
	StressTotalPre	StressTotalPost	AnxietyTotalPre	AnxietyTotalPost
Mann-Whitney U	6312.5	6000.5	5973	5691.5
Wilcoxon W	22243.5	8628.5	21904	8319.5
Z	-0.185754	-0.795308	-0.848017	-1.39881
Asymp. Sig. (2-tailed)	0.852637	0.426434	0.396428	0.16187
a. Grouping Variable: Secondary school,Diploma,BSc,MSc
Descriptive Statistics
	N	Mean	Std. Deviation	Minimum	Maximum	Percentiles
						25th	50th (Median)	75th
StressTotalPre	250	5.72	5.18431	0	21	1	5	8
AnxietyTotalPre	250	4.72	4.68716	0	21	1	3	7
StressTotalPost	250	4.488	3.5559	0	15	1	4	7
AnxietyTotalPost	250	4.544	3.46411	0	16	1	5	7
Wilcoxon Signed Ranks Test
Ranks
		N	Mean Rank	Sum of Ranks
StressTotalPost - StressTotalPre	Negative Ranks	126a	114.405	14415
	Positive Ranks	84b	92.1429	7740
	Ties	40c
	Total	250
AnxietyTotalPost - AnxietyTotalPre	Negative Ranks	108d	107.866	11649.5
	Positive Ranks	103e	104.044	10716.5
	Ties	39f
	Total	250
a. StressTotalPost < StressTotalPre
b. StressTotalPost > StressTotalPre
c. StressTotalPost = StressTotalPre
d. AnxietyTotalPost < AnxietyTotalPre
e. AnxietyTotalPost > AnxietyTotalPre
f. AnxietyTotalPost = AnxietyTotalPre
Test Statisticsa
	StressTotalPost - StressTotalPre	AnxietyTotalPost - AnxietyTotalPre
Z	-3.813b	-.529b
Asymp. Sig. (2-tailed)	0.000137079	0.596707
a. Wilcoxon Signed Ranks Test
b. Based on positive ranks.
Kruskal-Wallis Test
Ranks
Postpain		N	Mean Rank
StressTotalPre	Mild	204	119.902
	Moderate	40	152.338
	Severe	6	136.917
	Total	250
StressTotalPost	Mild	204	126.15
	Moderate	40	121.625
	Severe	6	129.25
	Total	250
AnxietyTotalPre	Mild	204	120.9
	Moderate	40	147.725
	Severe	6	133.75
	Total	250
AnxietyTotalPost	Mild	204	126.826
	Moderate	40	114.85
	Severe	6	151.417
	Total	250
Test Statisticsa,b
	StressTotalPre	StressTotalPost	AnxietyTotalPre	AnxietyTotalPost
Chi-Square	6.9792	0.150562	4.77007	1.74396
df	2	2	2	2
Asymp. Sig.	0.030513	0.927483	0.0920857	0.418124
a. Kruskal Wallis Test
b. Grouping Variable: Postpain

## Sheet: Moderate to severe anxiety
NPar Tests
Descriptive Statistics
	N	Mean	Std. Deviation	Minimum
					50th (Median)	75th
StressTotalPre	93	10.129	4.83022	0	8	14
AnxietyTotalPre	93	9.69892	3.7987	6	8	13
StressTotalPost	93	5.49462	4.33044	0	5	8
AnxietyTotalPost	93	5.07527	4.27388	0	6	8
Ranks
		N	Mean Rank	Sum of Ranks
StressTotalPost - StressTotalPre	Negative Ranks	76a	46.0132	3497
	Positive Ranks	10b	24.4	244
	Ties	7c
	Total	93
AnxietyTotalPost - AnxietyTotalPre	Negative Ranks	80d	46.0187	3681.5
	Positive Ranks	8e	29.3125	234.5
	Ties	5f
	Total	93
a. StressTotalPost < StressTotalPre
b. StressTotalPost > StressTotalPre
c. StressTotalPost = StressTotalPre
d. AnxietyTotalPost < AnxietyTotalPre
e. AnxietyTotalPost > AnxietyTotalPre
f. AnxietyTotalPost = AnxietyTotalPre
Test Statisticsa
	StressTotalPost - StressTotalPre	AnxietyTotalPost - AnxietyTotalPre
Z	-7.134b	-7.273b
Asymp. Sig. (2-tailed)	9.72055e-13	3.52557e-13
a. Wilcoxon Signed Ranks Test
b. Based on positive ranks.
Mann-Whitney Test
Ranks
Gender		N	Mean Rank	Sum of Ranks
StressTotalPre	Male	28	42.2679	1183.5
	Female	65	49.0385	3187.5
	Total	93
StressTotalPost	Male	28	46.1786	1293
	Female	65	47.3538	3078
	Total	93
AnxietyTotalPre	Male	28	45.2679	1267.5
	Female	65	47.7462	3103.5
	Total	93
AnxietyTotalPost	Male	28	46.6786	1307
	Female	65	47.1385	3064
	Total	93
Test Statisticsa
	StressTotalPre	StressTotalPost	AnxietyTotalPre	AnxietyTotalPost
Mann-Whitney U	777.5	887	861.5	901
Wilcoxon W	1183.5	1293	1267.5	1307
Z	-1.12883	-0.19429	-0.41693	-0.0761782
Asymp. Sig. (2-tailed)	0.258969	0.845949	0.676729	0.939277
a. Grouping Variable: Gender
Mann-Whitney Test
Ranks
Secondary school,Diploma,BSc,MSc		N	Mean Rank	Sum of Ranks
StressTotalPre	Secondary	29	48.8276	1416
	Higher than secondary	64	46.1719	2955
	Total	93
StressTotalPost	Secondary	29	43.069	1249
	Higher than secondary	64	48.7812	3122
	Total	93
AnxietyTotalPre	Secondary	29	50.8276	1474
	Higher than secondary	64	45.2656	2897
	Total	93
AnxietyTotalPost	Secondary	29	42.4138	1230
	Higher than secondary	64	49.0781	3141
	Total	93
Test Statisticsa
	StressTotalPre	StressTotalPost	AnxietyTotalPre	AnxietyTotalPost
Mann-Whitney U	875	814	817	795
Wilcoxon W	2955	1249	2897	1230
Z	-0.447132	-0.953618	-0.944912	-1.11477
Asymp. Sig. (2-tailed)	0.65478	0.340277	0.344704	0.264948
a. Grouping Variable: Secondary school,Diploma,BSc,MSc
Mann-Whitney Test
Ranks
Infected with disease or not		N	Mean Rank	Sum of Ranks
StressTotalPre	YES	6	45	270
	NO	87	47.1379	4101
	Total	93
StressTotalPost	YES	6	42.6667	256
	NO	87	47.2989	4115
	Total	93
AnxietyTotalPre	YES	6	43.25	259.5
	NO	87	47.2586	4111.5
	Total	93
AnxietyTotalPost	YES	6	49.6667	298
	NO	87	46.8161	4073
	Total	93
Test Statisticsa
	StressTotalPre	StressTotalPost	AnxietyTotalPre	AnxietyTotalPost
Mann-Whitney U	249	235	238.5	245
Wilcoxon W	270	256	259.5	4073
Z	-0.190895	-0.410107	-0.361164	-0.252877
Asymp. Sig. (2-tailed)	0.848608	0.681728	0.717977	0.800364
a. Grouping Variable: Infected with disease or not
Mann-Whitney Test
Ranks
AgeCAt		N	Mean Rank	Sum of Ranks
StressTotalPre	25 years or below	67	47.9776	3214.5
	Above 25 years	26	44.4808	1156.5
	Total	93
StressTotalPost	25 years or below	67	48.4254	3244.5
	Above 25 years	26	43.3269	1126.5
	Total	93
AnxietyTotalPre	25 years or below	67	50.597	3390
	Above 25 years	26	37.7308	981
	Total	93
AnxietyTotalPost	25 years or below	67	48.2164	3230.5
	Above 25 years	26	43.8654	1140.5
	Total	93
Test Statisticsa
	StressTotalPre	StressTotalPost	AnxietyTotalPre	AnxietyTotalPost
Mann-Whitney U	805.5	775.5	630	789.5
Wilcoxon W	1156.5	1126.5	981	1140.5
Z	-0.570382	-0.82459	-2.11763	-0.705111
Asymp. Sig. (2-tailed)	0.568419	0.409605	0.0342063	0.480741
a. Grouping Variable: AgeCAt
Kruskal-Wallis Test
Ranks
Single,Married,Divorce,Widow		N	Mean Rank
StressTotalPre	Single	18	49.6389
	Married	54	45.2037
	Divorce	7	50.3571
	Widow	14	48.8571
	Total	93
StressTotalPost	Single	18	48.0833
	Married	54	43.2315
	Divorce	7	58.3571
	Widow	14	54.4643
	Total	93
AnxietyTotalPre	Single	18	58.0833
	Married	54	43.8056
	Divorce	7	52.0714
	Widow	14	42.5357
	Total	93
AnxietyTotalPost	Single	18	47.9444
	Married	54	44.7593
	Divorce	7	60.4286
	Widow	14	47.7143
	Total	93
Test Statisticsa,b
	StressTotalPre	StressTotalPost	AnxietyTotalPre	AnxietyTotalPost
Chi-Square	0.606184	3.4506	4.65856	2.18246
df	3	3	3	3
Asymp. Sig.	0.895015	0.327226	0.198575	0.535412
a. Kruskal Wallis Test
b. Grouping Variable: Single,Married,Divorce,Widow
Nonparametric Correlations
Correlations
			StressTotalPre	StressTotalPost	Gender	Subjects age	Single,Married,Divorce,Widow	Secondary school,Diploma,BSc,MSc	Infected with disease or not
	StressTotalPre	Correlation Coefficient	1	.537**	0.117689	-0.0937736	0.00123975	-0.0466167	0.0199022
		Sig. (2-tailed)		2.78759e-08	0.261222	0.371289	0.99059	0.657248	0.849817
		N	93	93	93	93	93	93	93
	StressTotalPost	Correlation Coefficient	.537**	1	0.0202561	-0.0324058	0.101505	0.0994216	0.0427566
		Sig. (2-tailed)	2.78759e-08		0.847177	0.757805	0.332972	0.343042	0.684053
		N	93	93	93	93	93	93	93
	AnxietyTotalPre	Correlation Coefficient	.667**	.491**	0.043468	-0.191514	-0.148942	-0.0985139	0.037654
		Sig. (2-tailed)	2.98643e-13	5.91594e-07	0.679082	0.0659182	0.154192	0.347488	0.720091
		N	93	93	93	93	93	93	93
	AnxietyTotalPost	Correlation Coefficient	.439**	.866**	0.00794213	-0.0575756	0.0451206	0.116223	-0.0263642
		Sig. (2-tailed)	1.07659e-05	3.60083e-29	0.939772	0.583565	0.667588	0.267248	0.801928
		N	93	93	93	93	93	93	93
	Gender	Correlation Coefficient	0.117689	0.0202561	1	-0.11326	-0.0936264	.216*	-0.172361
		Sig. (2-tailed)	0.261222	0.847177		0.279719	0.372044	0.0375686	0.0985151
		N	93	93	93	93	93	93	93
	Subjects age	Correlation Coefficient	-0.0937736	-0.0324058	-0.11326	1	0.201984	-0.0543392	0.0401655
		Sig. (2-tailed)	0.371289	0.757805	0.279719		0.0521882	0.60493	0.70227
		N	93	93	93	93	93	93	93
	Single,Married,Divorce,Widow	Correlation Coefficient	0.00123975	0.101505	-0.0936264	0.201984	1	-0.036406	0.0823774
		Sig. (2-tailed)	0.99059	0.332972	0.372044	0.0521882		0.729002	0.432448
		N	93	93	93	93	93	93	93
	Secondary school,Diploma,BSc,MSc	Correlation Coefficient	-0.0466167	0.0994216	.216*	-0.0543392	-0.036406	1	0.0121915
		Sig. (2-tailed)	0.657248	0.343042	0.0375686	0.60493	0.729002		0.907665
		N	93	93	93	93	93	93	93
	Infected with disease or not	Correlation Coefficient	0.0199022	0.0427566	-0.172361	0.0401655	0.0823774	0.0121915	1
		Sig. (2-tailed)	0.849817	0.684053	0.0985151	0.70227	0.432448	0.907665
		N	93	93	93	93	93	93	93
**. Correlation is significant at the 0.01 level (2-tailed).
*. Correlation is significant at the 0.05 level (2-tailed).
Kruskal-Wallis Test
Ranks
PostPain		N	Mean Rank
StressTotalPre	1.00	69	43.8841
	2.00	22	60.0227
	3.00	2	11.25
	Total	93
StressTotalPost	1.00	69	45.6594
	2.00	22	51.1136
	3.00	2	48
	Total	93
AnxietyTotalPre	1.00	69	45.471
	2.00	22	50.6364
	3.00	2	59.75
	Total	93
AnxietyTotalPost	1.00	69	46.9493
	2.00	22	45.4318
	3.00	2	66
	Total	93
Test Statisticsa,b
	StressTotalPre	StressTotalPost	AnxietyTotalPre	AnxietyTotalPost
Chi-Square	9.88189	0.695848	1.1242	1.08839
df	2	2	2	2
Asymp. Sig.	0.00714785	0.706153	0.570011	0.58031
a. Kruskal Wallis Test
b. Grouping Variable: PostPain

## Sheet: Mild anxiety
Mann-Whitney Test
Ranks
Gender		N	Mean Rank	Sum of Ranks
StressTotalPre	Male	11	13.6818	150.5
	Female	20	17.275	345.5
	Total	31
StressTotalPost	Male	11	15.1818	167
	Female	20	16.45	329
	Total	31
AnxietyTotalPre	Male	11	15.5455	171
	Female	20	16.25	325
	Total	31
AnxietyTotalPost	Male	11	15	165
	Female	20	16.55	331
	Total	31
Test Statisticsa
	StressTotalPre	StressTotalPost	AnxietyTotalPre	AnxietyTotalPost
Mann-Whitney U	84.5	101	105	99
Wilcoxon W	150.5	167	171	165
Z	-1.06798	-0.384216	-0.238366	-0.471635
Asymp. Sig. (2-tailed)	0.285531	0.700818	0.811598	0.637187
Exact Sig. [2*(1-tailed Sig.)]	.298b	.730b	.855b	.670b
a. Grouping Variable: Gender
b. Not corrected for ties.
Mann-Whitney Test
Ranks
Secondary school,Diploma,BSc,MSc		N	Mean Rank	Sum of Ranks
StressTotalPre	Secondary	8	17.125	137
	Higher than secondary	23	15.6087	359
	Total	31
StressTotalPost	Secondary	8	13.9375	111.5
	Higher than secondary	23	16.7174	384.5
	Total	31
AnxietyTotalPre	Secondary	8	16.25	130
	Higher than secondary	23	15.913	366
	Total	31
AnxietyTotalPost	Secondary	8	13.9375	111.5
	Higher than secondary	23	16.7174	384.5
	Total	31
Test Statisticsa
	StressTotalPre	StressTotalPost	AnxietyTotalPre	AnxietyTotalPost
Mann-Whitney U	83	75.5	90	75.5
Wilcoxon W	359	111.5	366	111.5
Z	-0.412161	-0.770228	-0.104257	-0.77357
Asymp. Sig. (2-tailed)	0.680222	0.441165	0.916965	0.439185
Exact Sig. [2*(1-tailed Sig.)]	.707b	.464b	.947b	.464b
a. Grouping Variable: Secondary school,Diploma,BSc,MSc
b. Not corrected for ties.
Mann-Whitney Test
Ranks
Infected with disease or not		N	Mean Rank	Sum of Ranks
StressTotalPre	YES	5	4.6	23
	NO	26	18.1923	473
	Total	31
StressTotalPost	YES	5	21.6	108
	NO	26	14.9231	388
	Total	31
AnxietyTotalPre	YES	5	14.7	73.5
	NO	26	16.25	422.5
	Total	31
AnxietyTotalPost	YES	5	18.9	94.5
	NO	26	15.4423	401.5
	Total	31
Test Statisticsa
	StressTotalPre	StressTotalPost	AnxietyTotalPre	AnxietyTotalPost
Mann-Whitney U	8	37	58.5	50.5
Wilcoxon W	23	388	73.5	401.5
Z	-3.10553	-1.555	-0.403113	-0.808763
Asymp. Sig. (2-tailed)	0.00189936	0.119946	0.686865	0.418652
Exact Sig. [2*(1-tailed Sig.)]	.001b	.144b	.735b	.448b
a. Grouping Variable: Infected with disease or not
b. Not corrected for ties.
Mann-Whitney Test
Ranks
AgeCAt		N	Mean Rank	Sum of Ranks
StressTotalPre	25 years or below	25	16.42	410.5
	Above 25 years	6	14.25	85.5
	Total	31
StressTotalPost	25 years or below	25	15.08	377
	Above 25 years	6	19.8333	119
	Total	31
AnxietyTotalPre	25 years or below	25	15.32	383
	Above 25 years	6	18.8333	113
	Total	31
AnxietyTotalPost	25 years or below	25	14.9	372.5
	Above 25 years	6	20.5833	123.5
	Total	31
Test Statisticsa
	StressTotalPre	StressTotalPost	AnxietyTotalPre	AnxietyTotalPost
Mann-Whitney U	64.5	52	58	47.5
Wilcoxon W	85.5	377	383	372.5
Z	-0.53257	-1.18912	-0.981495	-1.42795
Asymp. Sig. (2-tailed)	0.594331	0.234392	0.326348	0.153307
Exact Sig. [2*(1-tailed Sig.)]	.608b	.268b	.419b	.174b
a. Grouping Variable: AgeCAt
b. Not corrected for ties.
Kruskal-Wallis Test
Ranks
Single,Married,Divorce,Widow		N	Mean Rank
StressTotalPre	Single	6	16.25
	Married	24	16.5208
	Divorce	1	2
	Total	31
StressTotalPost	Single	6	11.0833
	Married	24	16.6458
	Divorce	1	30
	Total	31
AnxietyTotalPre	Single	6	18.8333
	Married	24	15.6042
	Divorce	1	8.5
	Total	31
AnxietyTotalPost	Single	6	13
	Married	24	16.1458
	Divorce	1	30.5
	Total	31
Test Statisticsa,b
	StressTotalPre	StressTotalPost	AnxietyTotalPre	AnxietyTotalPost
Chi-Square	2.52554	4.54045	1.74479	3.45415
df	2	2	2	2
Asymp. Sig.	0.282869	0.103289	0.417949	0.177804
a. Kruskal Wallis Test
b. Grouping Variable: Single,Married,Divorce,Widow
Statistics
Infected with disease or not
N	Valid	31
	Missing	0
Infected with disease or not
		Frequency	Percent	Valid Percent
Valid	YES	5	16.129	16.129
	NO	26	83.871	83.871
	Total	31	100	100
Correlations
			StressTotalPre	StressTotalPost	AnxietyTotalPre	AnxietyTotalPost	Gender	Subjects age	Single,Married,Divorce,Widow	Secondary school,Diploma,BSc,MSc	Infected with disease or not
Spearman's rho	StressTotalPre	Correlation Coefficient	1	-.362*	0.109814	0.03547	0.194985	-0.0887137	-0.111048	-0.0752499	.567**
		Sig. (2-tailed)		0.0451415	0.556481	0.849754	0.29319	0.635089	0.552029	0.687443	0.000881465
		N	31	31	31	31	31	31	31	31	31
	StressTotalPost	Correlation Coefficient	-.362*	1	-0.108205	.459**	0.0701479	0.277015	0.353908	0.140624	-0.283903
		Sig. (2-tailed)	0.0451415		0.562315	0.00934286	0.707676	0.131383	0.0507912	0.450521	0.121672
		N	31	31	31	31	31	31	31	31	31
	AnxietyTotalPre	Correlation Coefficient	0.109814	-0.108205	1	-0.127411	0.0435194	0.124923	-0.223207	-0.0190347	0.073598
		Sig. (2-tailed)	0.556481	0.562315		0.494585	0.816182	0.503118	0.227434	0.919047	0.693971
		N	31	31	31	31	31	31	31	31	31
	AnxietyTotalPost	Correlation Coefficient	0.03547	.459**	-0.127411	1	0.0861084	.383*	0.259747	0.141234	-0.147659
		Sig. (2-tailed)	0.849754	0.00934286	0.494585		0.645095	0.0334469	0.158205	0.448539	0.427949
		N	31	31	31	31	31	31	31	31	31
	Gender	Correlation Coefficient	0.194985	0.0701479	0.0435194	0.0861084	1	-0.22258	0.181325	0.17893	.408*
		Sig. (2-tailed)	0.29319	0.707676	0.816182	0.645095		0.228776	0.32896	0.335497	0.0226967
		N	31	31	31	31	31	31	31	31	31
	Subjects age	Correlation Coefficient	-0.0887137	0.277015	0.124923	.383*	-0.22258	1	.545**	-0.016785	-0.299537
		Sig. (2-tailed)	0.635089	0.131383	0.503118	0.0334469	0.228776		0.00151057	0.928589	0.10162
		N	31	31	31	31	31	31	31	31	31
	Single,Married,Divorce,Widow	Correlation Coefficient	-0.111048	0.353908	-0.223207	0.259747	0.181325	.545**	1	0.113298	-0.336976
		Sig. (2-tailed)	0.552029	0.0507912	0.227434	0.158205	0.32896	0.00151057		0.543949	0.0637763
		N	31	31	31	31	31	31	31	31	31
	Secondary school,Diploma,BSc,MSc	Correlation Coefficient	-0.0752499	0.140624	-0.0190347	0.141234	0.17893	-0.016785	0.113298	1	-0.0581918
		Sig. (2-tailed)	0.687443	0.450521	0.919047	0.448539	0.335497	0.928589	0.543949		0.755841
		N	31	31	31	31	31	31	31	31	31
	Infected with disease or not	Correlation Coefficient	.567**	-0.283903	0.073598	-0.147659	.408*	-0.299537	-0.336976	-0.0581918	1
		Sig. (2-tailed)	0.000881465	0.121672	0.693971	0.427949	0.0226967	0.10162	0.0637763	0.755841
		N	31	31	31	31	31	31	31	31	31
*. Correlation is significant at the 0.05 level (2-tailed).
**. Correlation is significant at the 0.01 level (2-tailed).
Kruskal-Wallis Test
Ranks
PostPain		N	Mean Rank
StressTotalPre	1.00	26	14.8654
	2.00	4	20.125
	3.00	1	29
	Total	31
StressTotalPost	1.00	26	16.8077
	2.00	4	10.125
	3.00	1	18.5
	Total	31
AnxietyTotalPre	1.00	26	16.25
	2.00	4	16.25
	3.00	1	8.5
	Total	31
AnxietyTotalPost	1.00	26	16.0962
	2.00	4	13.125
	3.00	1	25
	Total	31
Test Statisticsa,b
	StressTotalPre	StressTotalPost	AnxietyTotalPre	AnxietyTotalPost
Chi-Square	3.36764	2.08589	0.9375	1.49123
df	2	2	2	2
Asymp. Sig.	0.185663	0.352415	0.625784	0.474442
a. Kruskal Wallis Test
b. Grouping Variable: PostPain

## Sheet: Normal
Mann-Whitney Test
Ranks
Gender		N	Mean Rank	Sum of Ranks
StressTotalPre	Male	31	58.8871	1825.5
	Female	95	65.0053	6175.5
	Total	126
StressTotalPost	Male	31	54.7419	1697
	Female	95	66.3579	6304
	Total	126
AnxietyTotalPre	Male	31	69.7581	2162.5
	Female	95	61.4579	5838.5
	Total	126
AnxietyTotalPost	Male	31	54.3387	1684.5
	Female	95	66.4895	6316.5
	Total	126
Test Statisticsa
	StressTotalPre	StressTotalPost	AnxietyTotalPre	AnxietyTotalPost
Mann-Whitney U	1329.5	1201	1278.5	1188.5
Wilcoxon W	1825.5	1697	5838.5	1684.5
Z	-0.833408	-1.56573	-1.17124	-1.64129
Asymp. Sig. (2-tailed)	0.404615	0.117412	0.241504	0.100737
a. Grouping Variable: Gender
Mann-Whitney Test
Ranks
Secondary school,Diploma,BSc,MSc		N	Mean Rank	Sum of Ranks
StressTotalPre	Secondary	35	57.1857	2001.5
	Higher than secondary	91	65.9286	5999.5
	Total	126
StressTotalPost	Secondary	35	63.2286	2213
	Higher than secondary	91	63.6044	5788
	Total	126
AnxietyTotalPre	Secondary	35	65.8857	2306
	Higher than secondary	91	62.5824	5695
	Total	126
AnxietyTotalPost	Secondary	35	57.9143	2027
	Higher than secondary	91	65.6484	5974
	Total	126
Test Statisticsa
	StressTotalPre	StressTotalPost	AnxietyTotalPre	AnxietyTotalPost
Mann-Whitney U	1371.5	1583	1509	1397
Wilcoxon W	2001.5	2213	5695	2027
Z	-1.23852	-0.0526816	-0.484749	-1.08643
Asymp. Sig. (2-tailed)	0.215525	0.957986	0.627854	0.277288
a. Grouping Variable: Secondary school,Diploma,BSc,MSc
Mann-Whitney Test
Ranks
Infected with disease or not		N	Mean Rank	Sum of Ranks
StressTotalPre	YES	8	54.25	434
	NO	118	64.1271	7567
	Total	126
StressTotalPost	YES	8	60	480
	NO	118	63.7373	7521
	Total	126
AnxietyTotalPre	YES	8	76.625	613
	NO	118	62.6102	7388
	Total	126
AnxietyTotalPost	YES	8	61.6875	493.5
	NO	118	63.6229	7507.5
	Total	126
DepressionTotalPre	YES	8	69.625	557
	NO	118	63.0847	7444
	Total	126
DepressionTotalPost	YES	8	59	472
	NO	118	63.8051	7529
	Total	126
Test Statisticsa
	StressTotalPre	StressTotalPost	AnxietyTotalPre	AnxietyTotalPost
Mann-Whitney U	398	444	367	457.5
Wilcoxon W	434	480	7388	493.5
Z	-0.761745	-0.285208	-1.11967	-0.14801
Asymp. Sig. (2-tailed)	0.446212	0.775485	0.262856	0.882335
a. Grouping Variable: Infected with disease or not
Mann-Whitney Test
Ranks
AgeCAt		N	Mean Rank	Sum of Ranks
StressTotalPre	25 years or below	95	65.0947	6184
	Above 25 years	31	58.6129	1817
	Total	126
StressTotalPost	25 years or below	95	65.0105	6176
	Above 25 years	31	58.871	1825
	Total	126
AnxietyTotalPre	25 years or below	95	62.5368	5941
	Above 25 years	31	66.4516	2060
	Total	126
AnxietyTotalPost	25 years or below	95	64.1211	6091.5
	Above 25 years	31	61.5968	1909.5
	Total	126
Test Statisticsa
	StressTotalPre	StressTotalPost	AnxietyTotalPre	AnxietyTotalPost
Mann-Whitney U	1321	1329	1381	1413.5
Wilcoxon W	1817	1825	5941	1909.5
Z	-0.882946	-0.827559	-0.552413	-0.340973
Asymp. Sig. (2-tailed)	0.377265	0.40792	0.580666	0.733124
a. Grouping Variable: AgeCAt
Kruskal-Wallis Test
Ranks
Single,Married,Divorce,Widow		N	Mean Rank
StressTotalPre	Single	22	64.2273
	Married	88	65.892
	Divorce	7	44
	Widow	9	53.5
	Total	126
StressTotalPost	Single	22	64.9773
	Married	88	66.0852
	Divorce	7	55.7143
	Widow	9	40.6667
	Total	126
AnxietyTotalPre	Single	22	66.5455
	Married	88	64.6477
	Divorce	7	56.2857
	Widow	9	50.4444
	Total	126
AnxietyTotalPost	Single	22	56.2045
	Married	88	67.3409
	Divorce	7	53.5714
	Widow	9	51.5
	Total	126
DepressionTotalPre	Single	22	68.1818
	Married	88	63.517
	Divorce	7	54.9286
	Widow	9	58.5556
	Total	126
DepressionTotalPost	Single	22	55.8182
	Married	88	67.9602
	Divorce	7	57.8571
	Widow	9	43.0556
	Total	126
Test Statisticsa,b
	StressTotalPre	StressTotalPost	AnxietyTotalPre	AnxietyTotalPost
Chi-Square	3.2366	4.4718	1.88983	3.47788
df	3	3	3	3
Asymp. Sig.	0.356565	0.214819	0.595584	0.323642
a. Kruskal Wallis Test
b. Grouping Variable: Single,Married,Divorce,Widow
Nonparametric Correlations
Correlations
			StressTotalPre	StressTotalPost	Gender	Subjects age	Single,Married,Divorce,Widow	Secondary school,Diploma,BSc,MSc	Infected with disease or not
Spearman's rho	StressTotalPre	Correlation Coefficient	1	.189*	0.0745423	-.250**	-0.0943671	0.110776	0.0681326
		Sig. (2-tailed)		0.0343741	0.406793	0.00475841	0.293232	0.216878	0.448424
		N	126	126	126	126	126	126	126
	StressTotalPost	Correlation Coefficient	.189*	1	0.140043	-0.0533117	-0.119239	0.00471198	0.0255098
		Sig. (2-tailed)	0.0343741		0.11781	0.553261	0.183561	0.958238	0.776764
		N	126	126	126	126	126	126	126
	AnxietyTotalPre	Correlation Coefficient	.482**	.279**	-0.104759	-0.103768	-0.0997034	-0.0433573	-0.100146
		Sig. (2-tailed)	1.12501e-08	0.00158707	0.243046	0.247553	0.266661	0.629763	0.264533
		N	126	126	126	126	126	126	126
	AnxietyTotalPost	Correlation Coefficient	.391**	.700**	0.146802	-0.031302	-0.00354165	0.0971733	0.0132384
		Sig. (2-tailed)	6.13733e-06	7.1525e-20	0.100939	0.727879	0.968604	0.279048	0.883032
		N	126	126	126	126	126	126	126
	Gender	Correlation Coefficient	0.0745423	0.140043	1	-.258**	-0.118448	0.0159992	0.153536
		Sig. (2-tailed)	0.406793	0.11781		0.00356907	0.186509	0.85887	0.0860782
		N	126	126	126	126	126	126	126
	Subjects age	Correlation Coefficient	-.250**	-0.0533117	-.258**	1	.303**	-0.105175	0.0707005
		Sig. (2-tailed)	0.00475841	0.553261	0.00356907		0.000564979	0.241168	0.431465
		N	126	126	126	126	126	126	126
	Single,Married,Divorce,Widow	Correlation Coefficient	-0.0943671	-0.119239	-0.118448	.303**	1	-0.159396	0.0951963
		Sig. (2-tailed)	0.293232	0.183561	0.186509	0.000564979		0.0746181	0.288992
		N	126	126	126	126	126	126	126
	Secondary school,Diploma,BSc,MSc	Correlation Coefficient	0.110776	0.00471198	0.0159992	-0.105175	-0.159396	1	-0.0161479
		Sig. (2-tailed)	0.216878	0.958238	0.85887	0.241168	0.0746181		0.857572
		N	126	126	126	126	126	126	126
	Infected with disease or not	Correlation Coefficient	0.0681326	0.0255098	0.153536	0.0707005	0.0951963	-0.0161479	1
		Sig. (2-tailed)	0.448424	0.776764	0.0860782	0.431465	0.288992	0.857572
		N	126	126	126	126	126	126	126
*. Correlation is significant at the 0.05 level (2-tailed).
**. Correlation is significant at the 0.01 level (2-tailed).
Infected with disease or not
		Frequency	Percent	Valid Percent
Valid	YES	8	6.34921	6.34921
	NO	118	93.6508	93.6508
	Total	126	100	100
Kruskal-Wallis Test
Ranks
PostPain		N	Mean Rank
StressTotalPre	1.00	109	63.8349
	2.00	14	54.8571
	3.00	3	91.6667
	Total	126
StressTotalPost	1.00	109	65.8807
	2.00	14	44.4643
	3.00	3	65.8333
	Total	126
AnxietyTotalPre	1.00	109	64.1697
	2.00	14	55.1429
	3.00	3	78.1667
	Total	126
AnxietyTotalPost	1.00	109	65.4266
	2.00	14	48.8929
	3.00	3	61.6667
	Total	126
Test Statisticsa,b
	StressTotalPre	StressTotalPost	AnxietyTotalPre	AnxietyTotalPost
Chi-Square	2.72945	4.43638	1.42442	2.6556
df	2	2	2	2
Asymp. Sig.	0.255451	0.108806	0.490558	0.26506
a. Kruskal Wallis Test
b. Grouping Variable: PostPain
